# Supplementary material for: Keratins control intercellular adhesion involving PKC-α–mediated desmoplakin phosphorylation
Source: PubMed Central journal article supplement — J Cell Biol. 2013 May 27;201(5):681–92. doi: 10.1083/jcb.201208162 (PMC3664716; doi:10.1083/jcb.201208162), 2013-05-27
Supplement: supp_jcb.201208162_JCB_201208162_sm.pdf [file supp_jcb.201208162_JCB_201208162_sm.pdf]

Kröger et al., <http://www.jcb.org/cgi/content/full/jcb.201208162/DC1>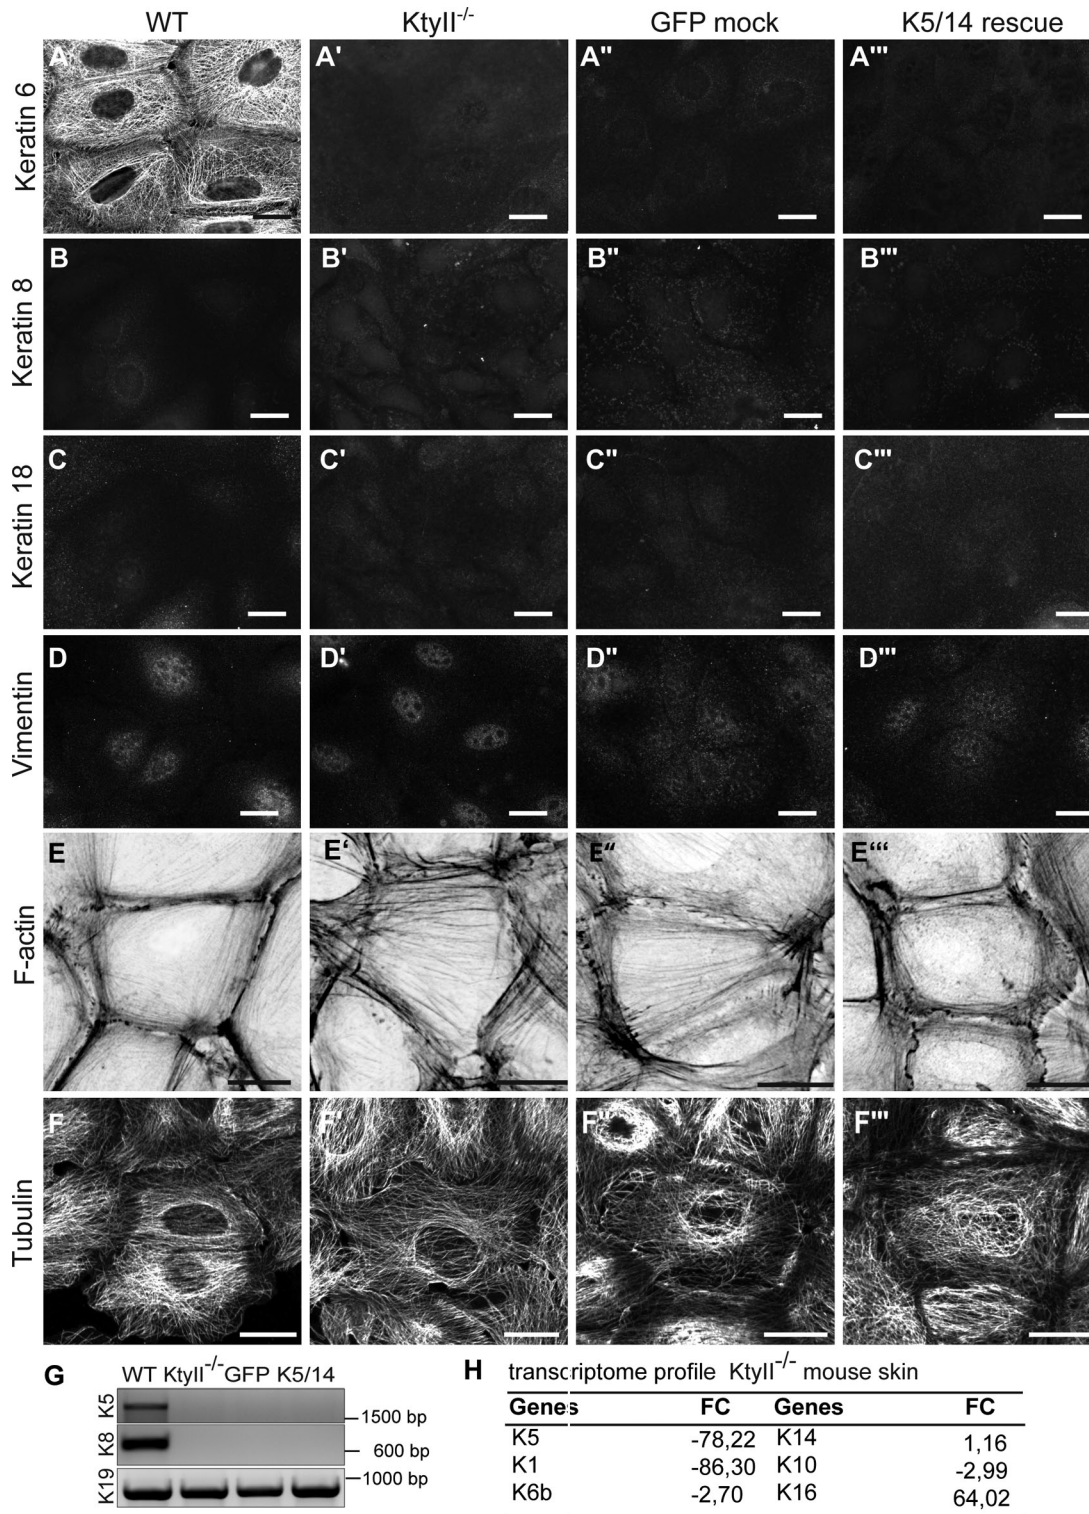

Figure S1. **Characterization of keratinocyte lines.** (A–D'') Immunofluorescence confirmed absence of keratin proteins in Ktyll<sup>-/-</sup> and GFP mock cells (A'–A''; B'–B''). No other IF proteins compensated as revealed by K8 (B–B''), K18 (C–C''), and vimentin staining in both cell types (D–D''). (E–E'') Strong increase in cytosolic and concomitant decrease in cortical actin stress fibers in Ktyll<sup>-/-</sup> cells (E') compared with controls (E and E''). (F–F'') No major alterations of MT in the absence of keratins. Bars, 10  $\mu$ m. (G) Confirmation of Ktyll cluster deletion by genomic PCR for K5 and K8. Type I keratin K19 remained. (H) Transcriptome data from skin of Ktyll<sup>-/-</sup> E.18.5 skin, confirming absence of type II keratin mRNAs and persistence at lower levels of K10 and K14 mRNA.



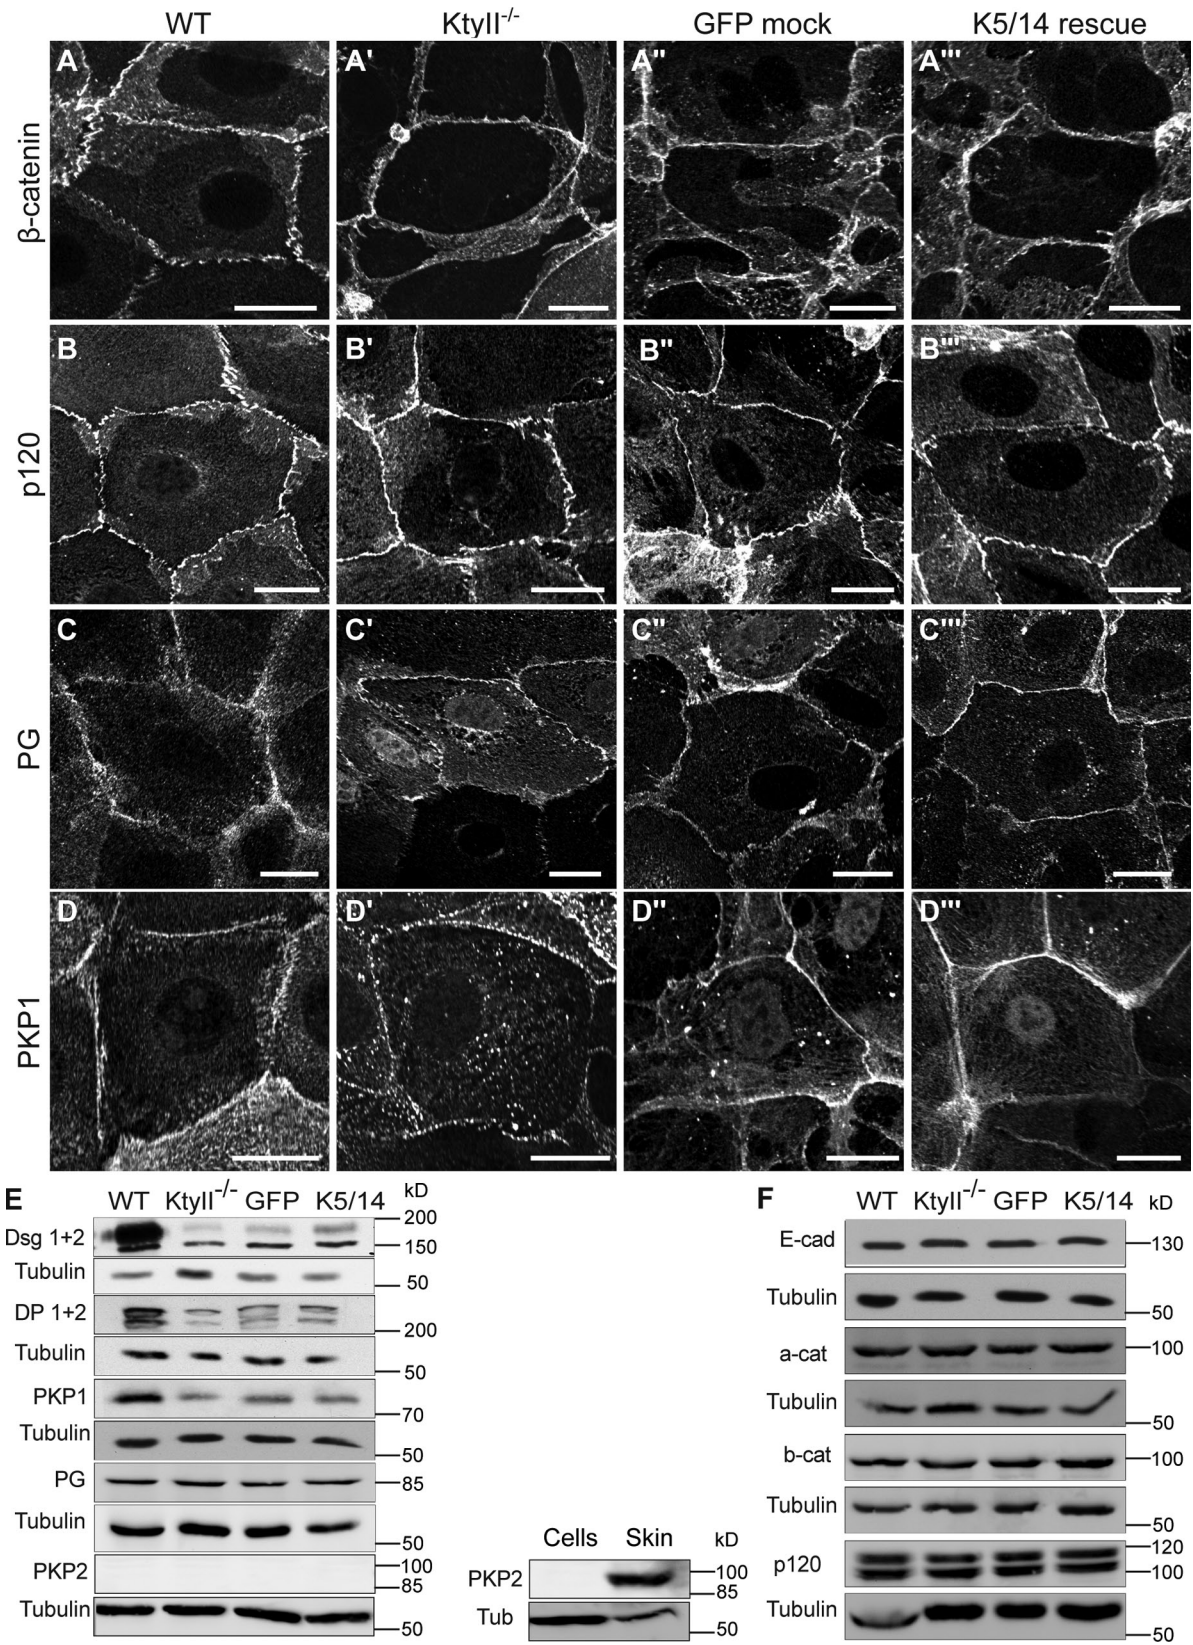

Figure S2. **Analysis of junction proteins.** (A–A''' and B–B''') AJ-associated proteins β-catenin (A–A''') and p120 (B–B''') seemed unaltered in WT (A, A'''; B, B''') and *Ktyll*<sup>-/-</sup> cells (A', A'''; B', B'''). PG displayed no difference in the four different cell types (C–C'''). PKP1 (D–D''') staining showed same re-distribution in *Ktyll*<sup>-/-</sup> cells (D', D''') as other desmosomal proteins. Bars: (A–D''') 10 μm. (E–F) WB (*n* = 3) of desmosomal proteins showed strong reduction in *Ktyll*<sup>-/-</sup> (E), and unaltered AJ proteins and plakoglobin in all four cell lines (E and F).



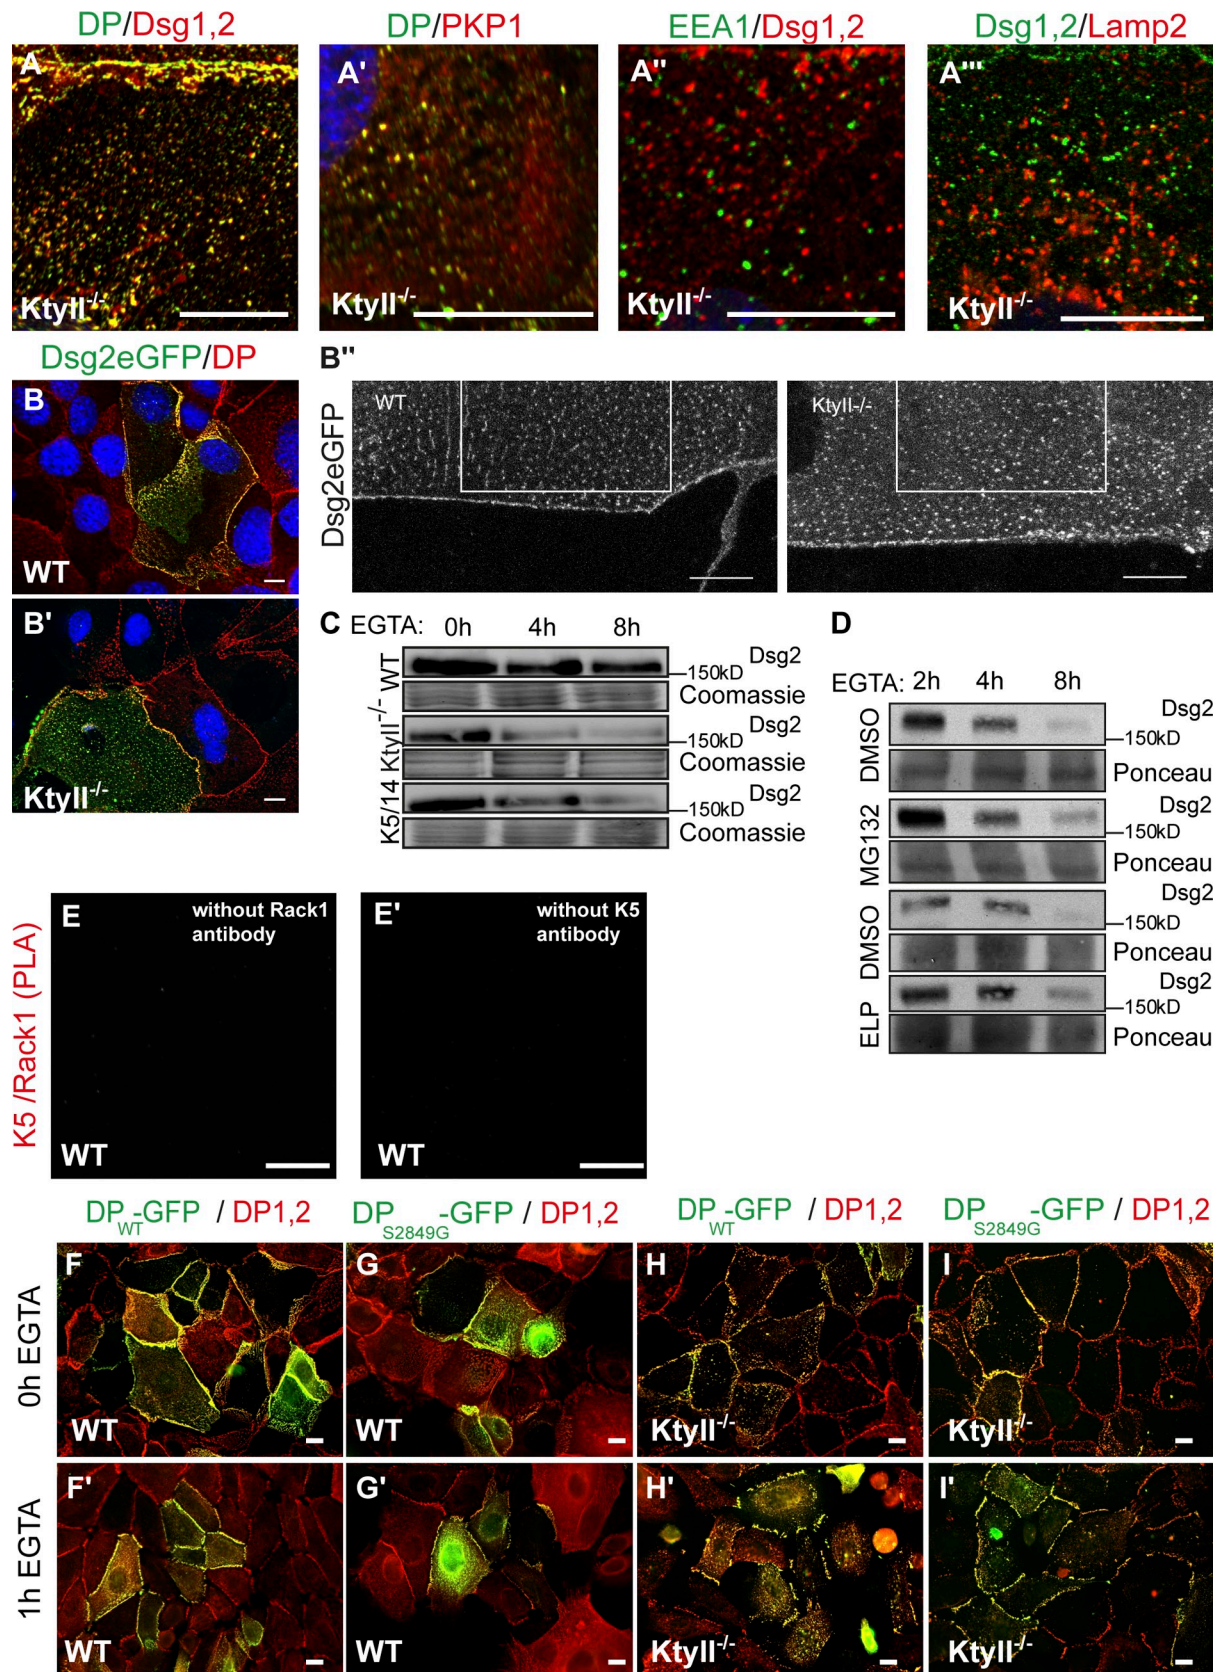

Figure S3. **Analysis of keratin–desmosome interactions.** (A–A''') Colocalization of Dsg/DP (A) and DP/PKP1 (A') in cytosol of Ktyll<sup>-/-</sup> cells, no colocalization of Dsg2 with EEA1 (A'') or Lamp2 (A'''). (B–B') Colocalization of Dsg2-eGFP with endogenous DP in WT and Ktyll<sup>-/-</sup> cells. (B'') Confocal images showing projections of 10 focal planes of WT and Ktyll<sup>-/-</sup> cells expressing Dsg2-eGFP depicting regions used for the tracking analysis. 120 frames were examined for image analysis in Fig. 2. (C) WB of total protein lysates after EGTA treatment demonstrated accelerated degradation of Dsg2 in Ktyll<sup>-/-</sup> cells reverted by reexpression of K5/14. (D) WB of total protein lysates after EGTA treatment demonstrated that MG132 and ELP inhibit Dsg2 degradation to distinct extents. (E–E') Negative control for PLA. (F–I') Colocalization of DP<sub>WT</sub>-GFP and DP<sub>S2849G</sub>-GFP with endogenous DP in WT and Ktyll<sup>-/-</sup> cells. Bars, 10 µm.

Table S1. **Antibodies**

| <b>Primary antibodies</b>               | <b>Host</b> | <b>Source</b>                                                      |
|-----------------------------------------|-------------|--------------------------------------------------------------------|
| Anti-KRT5                               | Rabbit      | Magin laboratory                                                   |
| Anti-KRT5 head domain                   | Guinea pig  | Betz et al., 2006                                                  |
| Anti-KRT6, monoclonal                   | Mouse       | Progen                                                             |
| Anti-KRT8, monoclonal                   | Mouse       | Progen                                                             |
| Anti-KRT14                              | Rabbit      | Magin laboratory                                                   |
| Anti-KRT16                              | Rabbit      | P.A. Coulombe, The Johns Hopkins School of Medicine, Baltimore, MD |
| Anti-KRT17                              | Guinea pig  | L. Langbein, German Cancer Research Center, Heidelberg, Germany    |
| Anti-KRT18, monoclonal                  | Rabbit      | Epitomics                                                          |
| Anti-vimentin                           | Rabbit      | Magin laboratory                                                   |
| Anti- $\alpha$ -tubulin, monoclonal     | Mouse       | Sigma-Aldrich                                                      |
| Anti- $\beta$ -actin, monoclonal        | Mouse       | Sigma-Aldrich                                                      |
| Anti-E-cadherin, monoclonal             | Rat         | Sigma-Aldrich                                                      |
| Anti- $\alpha$ -catenin                 | Rabbit      | Sigma-Aldrich                                                      |
| Anti- $\beta$ -catenin, monoclonal      | Mouse       | Transduction Laboratories                                          |
| Anti-p120-catenin, monoclonal           | Mouse       | Santa Cruz Biotechnology, Inc.                                     |
| Anti-DP (II-5F)                         | Mouse       | D. Garrod, University of Manchester, Manchester, UK                |
| Anti-DP                                 | Guinea pig  | Progen                                                             |
| Anti-Dsg3.10, monoclonal                | Mouse       | Progen                                                             |
| Anti-PKP1, monoclonal                   | Mouse       | Epitomics                                                          |
| Anti-PKP3, monoclonal                   | Mouse       | Santa Cruz Biotechnology, Inc.                                     |
| Anti-plakoglobin, monoclonal            | Mouse       | Progen                                                             |
| Anti-p0071, monoclonal                  | Mouse       | Progen                                                             |
| Anti-phosphoserine                      | Rabbit      | Abcam                                                              |
| Anti-PKC- $\alpha$ , monoclonal         | Rabbit      | Epitomics                                                          |
| Anti-Rack1, monoclonal                  | Mouse       | Santa Cruz Biotechnology, Inc.                                     |
| <b>Secondary antibodies</b>             |             |                                                                    |
| Anti-mouse-DL488, -DL549, -DL649, -HRP  | Donkey      | Dianova                                                            |
| Anti-rabbit-DL488, -DL549, -DL649, -HRP | Donkey      | Dianova                                                            |
| Anti-rat-DL488, -DL549, -DL649, -HRP    | Donkey      | Dianova                                                            |
| Anti-guinea pig-DL488, -DL549, -DL649   | Donkey      | Dianova                                                            |

## Reference

Betz, R.C., L. Planko, S. Eigelshoven, S. Hanneken, S.M. Pasternack, H. Bussow, K. Van Den Bogaert, J. Wenzel, M. Braun-Falco, A. Rutten, et al. 2006. Loss-of-function mutations in the keratin 5 gene lead to Dowling-Degos disease. *Am. J. Hum. Genet.* 78:510–519. <http://dx.doi.org/10.1086/500850>
